# Supplementary material for: Intellectual Impairment in Patients with Newly Diagnosed HIV Infection in Southwestern Nigeria
Source: Hindawi journal article supplement (doi:10.1155/2015/185891), 2015-01-01
Supplement: f1 [file 185891.f1.pdf]

Supplement 1. Laboratory variables and intellectual performance in HIV positive patients using WAIS mean z - scores

| Variables                               | N  | Info   | Compr   | Arith   | Simi   | Dig<br>Span | Vocab  | Dig<br>Symb | Pic<br>Compl | Blk<br>Desg | Pic<br>Arran | Obj<br>Ass | Verb<br>Score | Perf<br>Score | FS<br>Score |
|-----------------------------------------|----|--------|---------|---------|--------|-------------|--------|-------------|--------------|-------------|--------------|------------|---------------|---------------|-------------|
| PCV(%)                                  |    |        |         |         |        |             |        |             |              |             |              |            |               |               |             |
| 20–29                                   | 28 | - 0.71 | - 0.82  | - 0.66  | -1.04  | - 0.99      | -0.61  | - 1.48      | - 1.01       | - 1.71      | - 0.62       | - 1.06     | - 0.81        | -1.61         | - 1.31      |
| >30                                     | 28 | - 0.82 | - 0.62  | - 0.48  | -0.63  | - 0.74      | -0.48  | - 1.17      | - 1.02       | - 1.30      | - 0.09       | - 1.01     | - 0.65        | -1.52         | - 1.12      |
| t                                       |    | 0.708  | - 0.830 | - 1.099 | -1.900 | - 1.600     | -0.830 | - 1.201     | 0.072        | - 1.466     | 2.714        | - 0.279    | - 1.090       | -0.423        | - 1.198     |
| p                                       |    | 0.482  | 0.410   | 0.277   | 0.063  | 0.115       | 0.410  | 0.235       | 0.943        | 0.149       | 0.009        | 0.781      | 0.281         | 0.667         | 0.236       |
| CD <sub>4</sub> Cell Count (Cells / uL) |    |        |         |         |        |             |        |             |              |             |              |            |               |               |             |
| <200                                    | 35 | -0.70  | -0.70   | -0.55   | -0.92  | -0.84       | -0.55  | -1.45       | -1.00        | -1.59       | -0.83        | -0.88      | -0.73         | -1.63         | -1.26       |
| 200 – 349                               | 14 | -0.80  | -0.84   | -0.52   | -0.81  | -1.08       | -0.43  | -1.28       | -1.07        | -1.45       | -1.09        | -1.27      | -1.71         | -1.57         | -1.18       |
| 350 – 499                               | 5  | -1.03  | -0.75   | -0.66   | -0.93  | -0.39       | -0.83  | -0.56       | -0.90        | -1.35       | -0.58        | -1.34      | -0.91         | -1.21         | -1.12       |
| > 500                                   | 4  | -0.77  | -0.70   | -0.77   | -0.33  | -1.06       | -0.68  | -1.29       | -1.28        | -0.98       | -0.73        | -1.41      | -0.79         | -1.51         | -1.22       |
| F                                       |    | 0.660  | 0.092   | 0.241   | 0.644  | 2.003       | 0.586  | 1.338       | 0.595        | 0.441       | 0.900        | 1.949      | 0.181         | 0.432         | 0.107       |
| p                                       |    | 0.580  | 0.964   | 0.867   | 0.590  | 0.124       | 0.627  | 0.272       | 0.621        | 0.725       | 0.448        | 0.133      | 0.909         | 0.731         | 0.956       |

# Supplement 2: Opportunistic infections and intellectual performance in HIV+ patients using WAIS mean z-scores

| Variables                            | N  | Info   | Compr  | Arith  | Simi   | Dig<br>Span | Vocab  | Dig<br>Symb | Pic<br>Compl | Blk<br>Desig | Pic<br>Arrag | Obj<br>Ass | Verb<br>Score | Perf<br>Score | Fs<br>Score |
|--------------------------------------|----|--------|--------|--------|--------|-------------|--------|-------------|--------------|--------------|--------------|------------|---------------|---------------|-------------|
| Presence of Opportunistic Infections |    |        |        |        |        |             |        |             |              |              |              |            |               |               |             |
| Yes                                  | 29 | -0.85  | -0.81  | -0.63  | -1.18  | -0.93       | -0.60  | -1.71       | -1.05        | -1.75        | -0.83        | -1.03      | -0.85         | -1.79         | -1.41       |
| No                                   | 29 | -0.69  | -0.65  | -0.50  | -0.53  | -0.82       | -0.51  | -0.93       | -0.99        | -1.25        | -0.90        | -1.07      | -0.64         | -1.35         | -1.02       |
| t                                    |    | -0.987 | -0.684 | -0.848 | -3.250 | -0.735      | -0.599 | -3.392      | -0.428       | -1.830       | 0.422        | 0.201      | -1.500        | -2.264        | -2.562      |
| P                                    |    | 0.328  | 0.497  | 0.400  | 0.002  | 0.465       | 0.552  | 0.001       | 0.670        | 0.073        | 0.675        | 0.841      | 0.139         | 0.027         | 0.013       |
| Type of Opportunistic Infections     |    |        |        |        |        |             |        |             |              |              |              |            |               |               |             |
| PTB                                  | 16 | -0.91  | -0.68  | -0.69  | -1.25  | -1.04       | -0.73  | -1.80       | -1.20        | -1.85        | -0.86        | -1.16      | -0.92         | -1.85         | -1.53       |
| Oral Cand                            | 4  | -0.51  | -0.57  | -0.36  | -0.54  | -0.76       | -0.22  | -1.53       | -0.58        | -1.47        | -1.09        | -0.74      | -0.45         | -1.76         | -1.11       |
| CNS Toxo                             | 2  | -0.51  | -1.83  | -1.05  | -1.63  | -1.16       | -0.22  | -1.93       | -1.16        | -1.34        | -1.09        | -1.13      | -0.89         | -1.89         | -1.43       |
| PTB + Oral                           | 6  | -0.99  | -0.91  | -0.59  | -1.30  | -0.76       | -0.58  | -1.53       | -0.94        | -1.75        | -0.61        | -0.92      | -0.88         | -1.66         | -1.32       |
| Candidiasis                          |    |        |        |        |        |             |        |             |              |              |              |            |               |               |             |
| Skin Herpes<br>+ PTB                 | 1  | -1.23  | -1.31  | -0.23  | -0.98  | -0.55       | -0.90  | -1.73       | -0.90        | -1.84        | -0.01        | -0.67      | -1.04         | -1.58         | -1.38       |
| F                                    |    | 0.568  | 0.734  | 0.522  | -1.091 | 0.497       | 0.816  | 0.217       | 2.173        | 0.210        | 0.705        | 0.427      | 0.575         | 0.105         | 0.425       |
| p                                    |    | 0.688  | 0.578  | 0.720  | 0.383  | 0.738       | 0.528  | 0.926       | 0.103        | 0.930        | 0.596        | 0.788      | 0.683         | 0.980         | 0.789       |

Supplement 3: Clinical variables and Intellectual Performance in HIV+ patients using WAIS mean z- Scores

| Variables                 | N  | Info  | Compr | Arith                          | Simi  | Dig Span | Vocab | Dig Symb                         | Pic Comp | Blk Desig | Pic Arrag | Obj Ass | Verb Score | Perf Score | Fs Score |
|---------------------------|----|-------|-------|--------------------------------|-------|----------|-------|----------------------------------|----------|-----------|-----------|---------|------------|------------|----------|
| WHO HIV                   |    |       |       |                                |       |          |       |                                  |          |           |           |         |            |            |          |
| Stage                     |    |       |       |                                |       |          |       |                                  |          |           |           |         |            |            |          |
| 1                         | 5  | -0.42 | -0.69 | -0.61                          | -0.20 | -1.12    | -0.27 | -1.22                            | -1.05    | -1.15     | -1.30     | -1.05   | -0.48      | -1.53      | -1.02    |
| 2                         | 11 | -0.78 | -0.68 | -0.50                          | -0.60 | -0.63    | -0.62 | -0.70                            | -1.18    | -0.99     | -0.73     | -1.11   | -0.70      | -1.17      | -1.13    |
| 3                         | 36 | -0.89 | -0.78 | -0.58                          | -0.99 | -0.94    | -0.65 | -1.50                            | -0.99    | -1.76     | -0.89     | -1.05   | -0.84      | -1.70      | -1.30    |
| 4                         | 6  | -0.37 | -0.62 | -0.59                          | -1.01 | -0.76    | -0.10 | -1.49                            | -0.94    | -1.11     | -0.61     | -0.92   | -0.46      | -1.57      | -1.02    |
| F                         |    | 1.922 | 0.075 | 0.059                          | 1.920 | 1.213    | 1.931 | 2.179                            | 0.539    | 2.175     | 1.200     | 0.097   | 1.399      | 1.315      | 0.726    |
| P                         |    | 0.137 | 0.973 | 0.981                          | 0.137 | 0.314    | 0.135 | 0.101                            | 0.657    | 0.102     | 0.318     | 0.962   | 0.253      | 0.279      | 0.541    |
| Weight (kg)               |    |       |       |                                |       |          |       |                                  |          |           |           |         |            |            |          |
| Men                       |    |       |       |                                |       |          |       |                                  |          |           |           |         |            |            |          |
| 40 – 49                   | 9  | -0.77 | -0.29 | -0.50                          | -0.30 | -0.96    | -0.41 | -1.43                            | -0.76    | -1.02     | -0.65     | -0.81   | -0.54      | -1.30      | -0.94    |
| 50 – 59                   | 16 | -0.75 | -0.64 | -0.53                          | -1.17 | -0.96    | -0.72 | -2.00                            | -1.22    | -1.75     | -1.13     | -1.30   | -0.84      | -2.10      | -1.50    |
| 60 – 69                   | 4  | -0.47 | -0.27 | -0.29                          | -0.38 | -1.37    | -0.31 | -0.68                            | -0.52    | -1.23     | -0.73     | -0.27   | -0.45      | -0.93      | -0.71    |
| ≥70                       | 2  | -0.92 | -0.52 | -0.23                          | -0.65 | -0.96    | -0.75 | -1.47                            | -1.28    | -0.86     | -1.09     | -1.01   | -0.49      | -1.54      | -1.85    |
| F                         |    | 0.576 | 1.315 | 0.236                          | 2.366 | 0.490    | 1.062 | 2.618                            | 4.797    | 1.135     | 1.797     | 2.248   | 1.214      | 4.081      | 3.740    |
| P                         |    | 0.636 | 0.290 | 0.870                          | 0.093 | 0.692    | 0.381 | 0.071                            | 0.008    | 0.352     | 0.171     | 0.106   | 0.324      | 0.016      | 0.023    |
| Weight (kg)               |    |       |       |                                |       |          |       |                                  |          |           |           |         |            |            |          |
| Women                     |    |       |       |                                |       |          |       |                                  |          |           |           |         |            |            |          |
| 30 – 39                   | 6  | -0.94 | -1.49 | -0.55                          | -0.83 | -1.03    | -0.66 | -1.18                            | -1.24    | -2.17     | -0.85     | -1.03   | -0.96      | -1.73      | -1.40    |
| 40 – 49                   | 7  | -1.01 | -1.61 | -0.66                          | -1.53 | -0.73    | -0.74 | -1.08                            | -1.12    | -1.70     | -0.62     | -1.15   | -1.10      | -1.49      | -1.37    |
| 50 – 59                   | 5  | -0.80 | -1.31 | -0.72                          | -1.19 | -0.47    | -0.62 | -0.68                            | -0.80    | -1.06     | -0.87     | -1.15   | -0.89      | -1.18      | -1.09    |
| 60 – 69                   | 5  | -1.06 | -0.62 | -0.72                          | -0.20 | -0.63    | -0.53 | -0.35                            | -1.00    | -1.25     | -0.44     | -1.34   | -0.69      | -1.06      | -0.92    |
| F                         |    | 0.267 | 3.280 | 0.108                          | 5.518 | 1.156    | 0.192 | 1.221                            | 0.797    | 1.331     | 0.370     | 0.271   | 1.023      | 1.089      | 1.100    |
| P                         |    | 0.848 | 0.043 | 0.954                          | 0.007 | 0.352    | 0.900 | 0.329                            | 0.510    | 0.294     | 0.776     | 0.846   | 0.405      | 0.378      | 0.374    |
| Info – information        |    |       |       | Dig Span – Digit Span          |       |          |       | Blk Desig – Block Design         |          |           |           |         |            |            |          |
| Compr – Comprehension     |    |       |       | Vocab – Vocabulary             |       |          |       | Pic Arrang – Picture Arrangement |          |           |           |         |            |            |          |
| Arith – Arithmetic        |    |       |       | Dig Symb – Digit Symbol        |       |          |       |                                  |          |           |           |         |            |            |          |
| Simi – Similarities       |    |       |       | Pic Compl – Picture Completion |       |          |       | Obj Ass – Object Assembly        |          |           |           |         |            |            |          |
| Verb Score – Verbal score |    |       |       | Perf Score – Performance Score |       |          |       | FS – Full Scale Score            |          |           |           |         |            |            |          |
